# Supplementary material for: Structural basis of tRNA modification with CO2 fixation and methylation by wybutosine synthesizing enzyme TYW4
Source: PubMed Central journal article supplement — Nucleic Acids Res. 2009 Mar 14;37(9):2910–25. doi: 10.1093/nar/gkp158 (PMC2685095; doi:10.1093/nar/gkp158), 2009-03-14
Supplement: gkp158_1.pdf [file gkp158_1.pdf]

## Supplementary Data

### Labeling of unique sequences in double-stranded DNA at sites of vicinal nicks generated by nicking endonucleases

Heiko Kuhn and Maxim D. Frank-Kamenetskii

Center for Advanced Biotechnology and Department of Biomedical Engineering, Boston University, MA 02215, USA

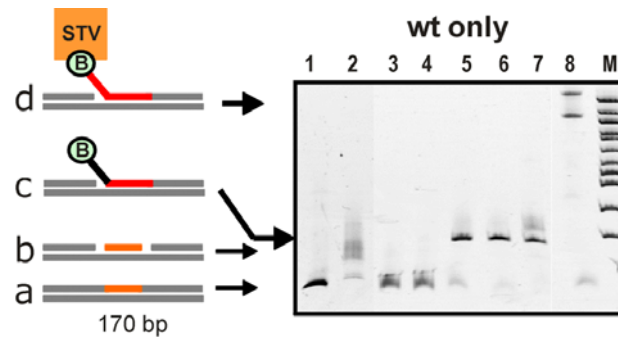

**Supplementary Figure 1.** Probe hybridization and ligation with a dsDNA fragment containing wt  $\lambda$ -DNA sequence. Lane 1: intact dsDNA; lane 2: dsDNA after incubation with nicking endonuclease Nt.BstNBI; lanes 3 to 7: nicked dsDNA after incubation with excess probe oligonucleotide P-45k-5'F (5'-biotin-TTTTTATCGTGAAGAGTCGGCG-3') at 30°C, 40°C, 50°C, 60°C, or 70°C, respectively, followed by ligation with T4 DNA ligase at 16°C; lane 8: an aliquot of sample shown in lane 5 after incubation with streptavidin.

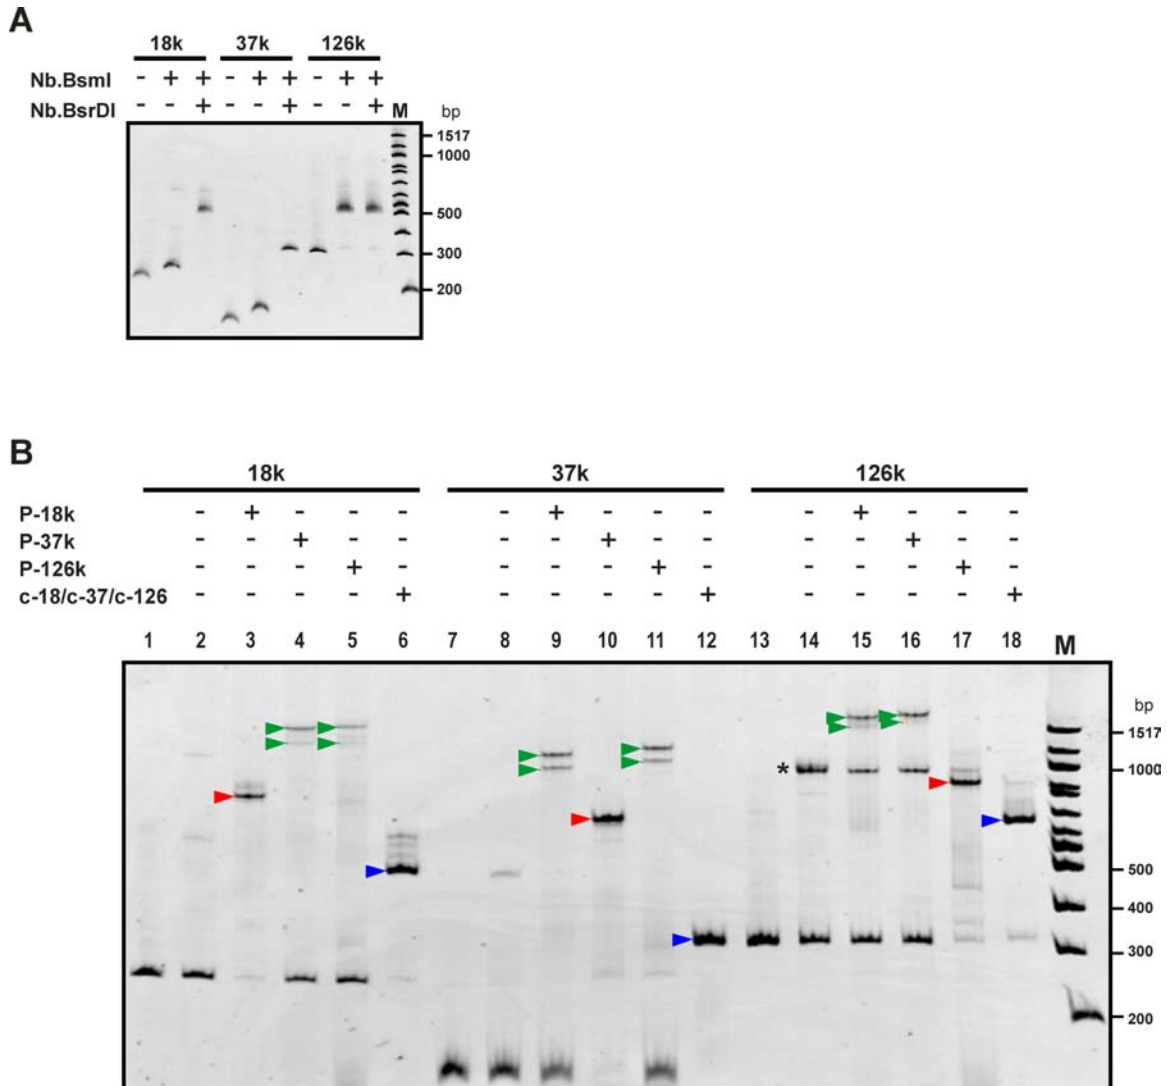

**Supplementary Figure 2.** (A) Monitoring of nicking reactions with dsDNA fragments containing either HHV-6B target site at 18 k (225 bp), 37 k (152 bp), or 126 k (304 bp). Samples were analyzed by 7.5 % PAGE containing 7 M urea. (B) Analysis of correct and incorrect probe ligation products. Ligation reactions with each dsDNA fragment, nicked by Nb.BsmI and Nb.BsrDI, were performed for 16 h at 6 °C using 10 units of T4 DNA ligase. Correct and incorrect probe ligation products are marked by red and green arrowheads, respectively. Gapped DNA fragments, obtained by incubation of doubly-nicked fragments with complementary capture oligonucleotides, are marked by blue arrowheads. Note that in the control with the 126k target fragment (lane 14), a new band with lower mobility appeared (asterisk).

**Supplementary Table 1.** Oligonucleotides employed for PCR and ssDNA circle preparation

---

| Oligo   | Sequence <sup>a</sup><br>(5'→3')                                                                             |
|---------|--------------------------------------------------------------------------------------------------------------|
| A       | GAGCGTTGTAGTCTTCGTAAAACGACGGCCAGTGAACATGTCCCAACATGTTGATGAGATGAAG                                             |
| B-wt    | CATCACAGTCGCACCCTCGCCGACTCTTCACGATTATCGACTCCTTCATCTCATCAACA                                                  |
| B-m1    | CATCACAGTCGCACCCTCGCCGACTCTTCACGATTATCGACTGCTTCATCTCATCAACA                                                  |
| B-m2    | CATCACAGTCGCACCCTCGCCACTCTTCACGATTATCGACTCCTTCATCTCATCAACA                                                   |
| C       | GGTGCGACTGTGATGATTAATATAGGGATATCCACACCAAACGTCA                                                               |
| D       | CAGAGCAACTTGTCTTCCAGGAAACAGCTATGACGTTTGGTGTGG                                                                |
| F1-18k  | TTCCACCAACGATTTCTGCGA                                                                                        |
| R1-18k  | CCGAGGAGTGCAATACAGAAGCC                                                                                      |
| F1-37k  | ACGTCTTTTCTCTCTTGTCCACA                                                                                      |
| R1-37k  | CCGCCGTCCTATTCAGAGGTGC                                                                                       |
| F1-126k | TCGGGAATAAACCTGTATTTGCACAA                                                                                   |
| R1-126k | CTCAAACGCCGTGTTTCACCAAG                                                                                      |
| CO-1    | P- <u>AAGGCTAGGAAT</u> GCCTCTCTCACTGCTTACTTGTTCACTCTGCTGTCTGA <u>AAGGCTAGGAAT</u> CGT-<br>CTCTCACTGCTTACTACT |

---

<sup>a</sup>Complementary overlaps between oligonucleotides A-D are marked in color. For oligonucleotide CO-1, the underlined sequences are identical with the sequence of the PNA beacon, while the italicized sequence is complementary to the priming segment of probe P\*-45k-3'F.
